# Supplementary material for: Robust detection and verification of linear relationships to generate metabolic networks using estimates of technical errors
Source: PubMed Central journal article supplement (PMC1894643; doi:10.1186/1471-2105-8-162), 2007-05-21
Supplement: 1471-2105-8-162-S4.pdf [file 1471-2105-8-162-S4.pdf]

**(Supplement 4) Definition of the filter**

False positive detections of hypothetical linearities are increasing at increasing technical errors but may be shifted towards false negative error rates, if needed. Such a case might be wished if false positive detections would hamper biological interpretations in a more severe way than if real linearities would stay undetected. Therefore, a filter has been developed using a calculation of a characteristic value  $t$  to suppress false positive errors (S17).

$$(S17) \quad t = \frac{\sqrt{\sum_{j=1}^m (\mu_x - x_j)(\mu_y - y_j)}}{\sqrt{\sum_{j=1}^m \sigma_{tech}(x_j)\sigma_{tech}(y_j)}}$$

$\mu_x$  mean of all measurements of metabolite  $x$

$\mu_y$  mean of all measurements of metabolite  $y$

$\sigma(x_j)$  standard deviation of the technical error distribution of metabolite  $x$  when measured in sample  $j$

$\sigma(y_j)$  standard deviation of the technical error distribution of metabolite  $y$  when measured in sample  $j$

The numerator in formula (1) comprises a modified form of the covariance. For the case of an exclusive technical error variance and an infinite sample number,  $t$  approximates zero because then the covariance will converge to zero. The denominator estimates the maximal covariance which can result from the assumed technical error. An upper limit for  $t$  can be determined by simulating a technical error distribution around a constant value. If the actual  $t$  is larger than the theoretical threshold for  $t$ , the hypothesis can be rejected that the corresponding covariance may have originated at random through the technical error. For  $t < t_{limi}$ , false positive discovery rates cannot be eliminated. In figure 1, simulation results for parameter  $t$  are given for a variation of sample numbers. The simulation set consists of the following steps:

- All metabolite concentrations are set to zero
- Each metabolite concentration is superimposed by technical error sampled from a Gaussian distribution
- $t$  is determined according to formula (1)

The simulation has been repeated at least 55.000 times.

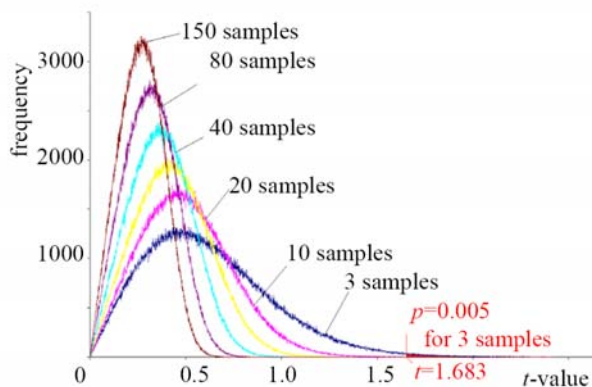

Figure S4.1: Simulation results for parameter according to equation (1), varying the number of samples in a data set. For each number of samples, one million simulations were carried out. As example, the threshold for  $t$  a  $p=0.005$  and three samples is given.

The value of  $t$  has been adjusted in a way that the detection rate of false positives remains below 5% independently from the degree of noise.
